# Supplementary material for: Fine Mapping and Candidate Gene Analysis of Pm36, a Wild Emmer-Derived Powdery Mildew Resistance Locus in Durum Wheat
Source: MDPI journal article supplement (doi:10.3390/ijms232113659), 2022-11-07
Supplement: s1 [file s1]

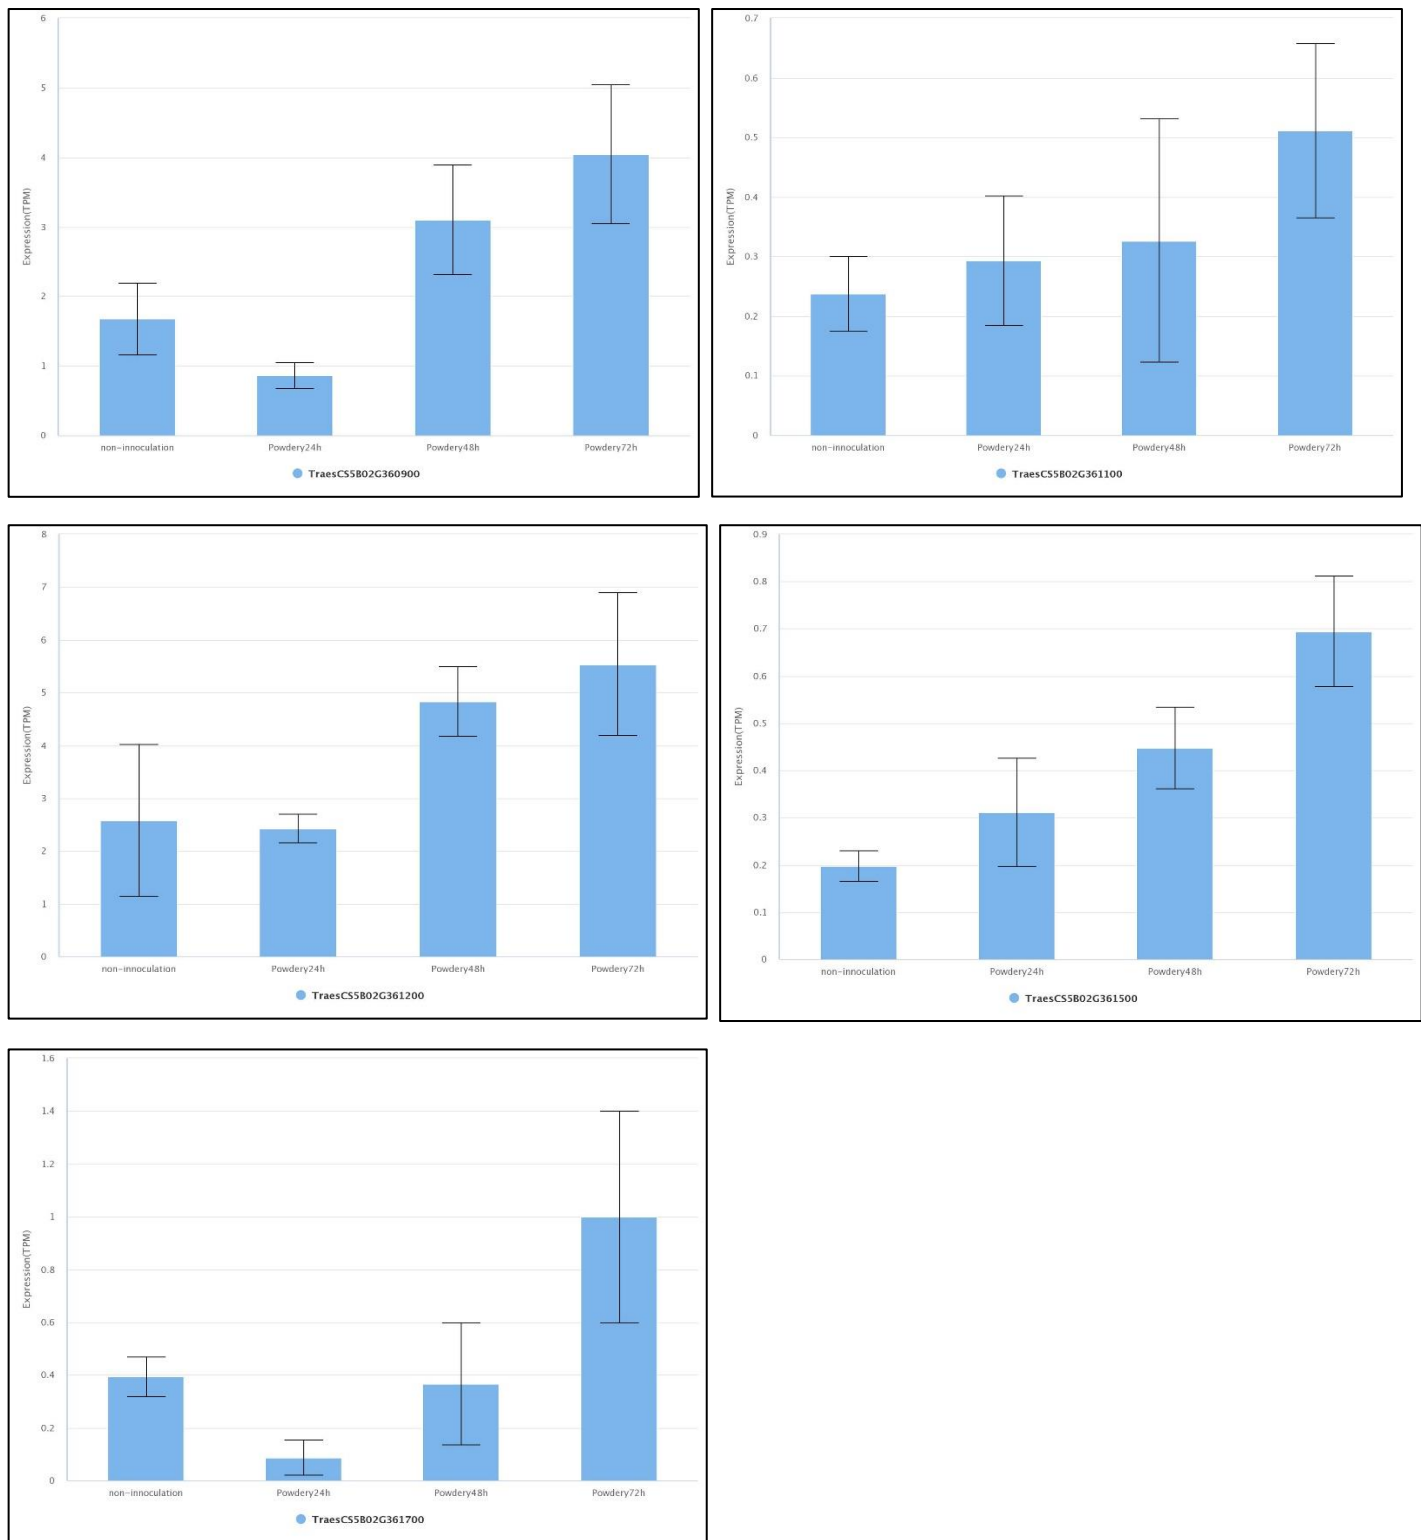

**Figure S1.** In silico expression (TPM) of the bread wheat Chinese Spring genes *TraesCS5B02G360900*, *TraesCS5B02G361100*, *TraesCS5B02G361200*, *TraesCS5B02G361500* and, *TraesCS5B01G361700* on leaves sampled 24, 48 and 72 hours after inoculation [49](<http://wheatomics.sdau.edu.cn/>).
