# Supplementary material for: Fine Mapping and Candidate Gene Analysis of Pm36, a Wild Emmer-Derived Powdery Mildew Resistance Locus in Durum Wheat
Source: Int J Mol Sci. 2022 Nov 7;23(21):13659. doi: 10.3390/ijms232113659 (PMC9657016; doi:10.3390/ijms232113659)
Supplement: Supplementary file 1 [file ijms-23-13659-s001.zip › Table S1.xlsx]

## Sheet: Foglio1
Table S1. Stable ID, physical position and annotated function of candidate genes present in the 1.1Mb interval of the 5BL chromosome of the wild emmer wheat Zavitan reference genome [46], durum wheat Svevo reference genome [45], bread wheat Chinese Spring reference genome [48].
Wild emmer wheat Zavitan reference genome v2.0 (Zhu et al., 2019)				Durum wheat Svevo reference genome v1.0 (Maccaferri et al., 2019)				Bread Wheat Chinese Spring IWGSC RefSeq v1.0 genome (2018)				Annotation
Gene stable ID	start..end bp (strand)	length (bp)		Gene stable ID	start..end bp (strand)	length (bp)		Gene stable ID	start..end bp (strand)	length (bp)
TRIDC5BG056650	Chr5B:555465739..555466624 (- strand)	886		TRITD5Bv1G186500	chr5B:537360386..537361272 (- strand)	887		TraesCS5B02G360700	chr5B:540268359..540269245 (- strand)	887		Mitochondrial glycoprotein
				TRITD5Bv1G186610	chr5B:537841301..537842647 (+ strand)	1347		TraesCS5B01G360800	chr5B:540732556..540733902 (+ strand)	1347		F-box family protein
TRIDC5BG056670	Chr5B:556071510..556074463 (- strand)	2954		TRITD5Bv1G186620	chr5B:537848559..537851603 (- strand)	3047		TraesCS5B01G360900	chr5B:540739813..540742857 (- strand)	3045		Cleavage and polyadenylation specificity factor subunit 3
				TRITD5Bv1G186630	chr5B:537854923..537857426 (- strand)	2504		TraesCS5B02G361000	chr5B:540746306..540748560 (- strand)	2255		Transmembrane protein, putative (DUF594)
TRIDC5BG056690	Chr5B:556140865..556142037 (- strand)	1173		TRITD5Bv1G186700	chr5B:538021470..538023332 (- strand)	1863		TraesCS5B02G361100	chr5B:540912804..540914666 (- strand)	1863		Purine permease-related family protein
TRIDC5BG056710	Chr5B:556340278..556341561 (+ strand)	1284		TRITD5Bv1G186770	chr5B:538192483..538195423 (+ strand)	2941		TraesCS5B01G361200	chr5B:541090025..541092965 (+ strand)	2941		BTB/POZ domain-containing family protein
TRIDC5BG056720	Chr5B:556348333..556349595 (+ strand)	1263		TRITD5Bv1G186780	chr5B:538200893..538203453 (+ strand)	2561		TraesCS5B01G361300	chr5B:541098435..541101472 (+ strand)	3038		BTB/POZ domain-containing family protein
				TRITD5Bv1G186820	chr5B:538212457..538213053 (+ strand)	597		TraesCS5B02G361400	chr5B:541110000..541110596 (+ strand)	547		Ulp1 protease family, C-terminal catalytic domain containing protein
TRIDC5BG056730	Chr5B:556406850..556407654 (+ strand)	805		TRITD5Bv1G186830	chr5B:538258624..538262043 (+ strand)	3420		TraesCS5B01G361500	chr5B:541156344..541159999 (+ strand)	3656		BTB/POZ domain-containing family protein
TRIDC5BG056750	Chr5B:556533021..556533810 (+ strand)	790		TRITD5Bv1G186870	chr5B:538385879..538388518 (+ strand)	2640		TraesCS5B01G361600	chr5B:541284253..541286560 (+ strand)	2308		BTB/POZ domain-containing family protein
TRIDC5BG056760	Chr5B:556567209..556567823 (+ strand)	615		TRITD5Bv1G186880	chr5B:538399683..538405117 (+ strand)	5435		TraesCS5B01G361700	chr5B:541297969..541303737 (+ strand)	5769		BTB/POZ domain-containing family protein
TRIDC5BG056770	Chr5B:556604058..556605486 (+ strand)	1429		TRITD5Bv1G186910	chr5B:538439104..538442543 (+ strand)	3440		TraesCS5B01G361800	chr5B:541337290..541340729 (+ strand)	3440		BTB/POZ domain-containing family protein
TRIDC5BG056780	Chr5B:556607025..556609427 (- strand)	2403		TRITD5Bv1G186920	chr5B:538443846..538446374 (- strand)	2529		TraesCS5B01G361900	chr5B:541342032..541344683 (- strand)	2652		Cytochrome b561 and domon domain-containing protein
